# Supplementary material for: Adherence to French and ESGO Quality Indicators in Ovarian Cancer Surgery: An Ad-Hoc Analysis from the Prospective Multicentric CURSOC Study
Source: Cancers (Basel). 2021 Mar 30;13(7):1593. doi: 10.3390/cancers13071593 (PMC8037412; doi:10.3390/cancers13071593)
Supplement: Supplementary file 1 [file cancers-13-01593-s001.pdf]

# Supplementary Material: Adherence to French and ESGO Quality Indicators in Ovarian Cancer Surgery: An Ad-Hoc Analysis from the Prospective Multicentric CURSOC Study

Martinez Alejandra, Witold Gertych, Christophe Pomel, Gwenael Ferron, Amelie Lusque, Martina Aida Angeles, Eric Lambaudie, Roman Rouzier, Naoual Bakrin, Francois Golfier, Olivier Glehen, Michel Canis, Nicolas Bourdel, Nicolas Pouget, Pierre-Emmanuel Colombo, Frédéric Guyon, Jacques Meurette and Denis Querleu

**Table S1.** Quality Indicators evaluated in the study.

| Quality Indicators                                                                              | Evaluated in the Study |
|-------------------------------------------------------------------------------------------------|------------------------|
| <b>Structural indicators</b>                                                                    |                        |
| Indicator 1.1                                                                                   |                        |
| 20 cytoreductive surgeries performed per center per year                                        | Yes                    |
| 10 surgical procedures per surgeon per year                                                     | Yes                    |
| At least 2 surgeons trained to achieve complete cytoreduction                                   | Yes                    |
| Indicator 1.2                                                                                   |                        |
| Formalized collaboration of the surgical team with a medical oncologist                         | Yes                    |
| Institutional contributions to ovarian cancer clinical trials                                   | Yes                    |
| <b>Process indicators</b>                                                                       |                        |
| Indicator 2.1                                                                                   |                        |
| Preoperative investigations (CT scan, Ca 125)                                                   | No*                    |
| Indicator 2.2                                                                                   |                        |
| Formal pretreatment multidisciplinary approach                                                  | No*                    |
| Indicator 2.3                                                                                   |                        |
| Pre, intra, and postoperative anaesthetic management                                            | No*                    |
| Indicator 2.4                                                                                   |                        |
| Median laparotomy                                                                               | No*                    |
| Indicator 2.5                                                                                   |                        |
| Pelvic and para-aortic lymphadenectomy                                                          | No*                    |
| Indicator 2.6                                                                                   |                        |
| Analytical description of peritoneal lesions and residual disease                               | No*                    |
| Indicator 2.7                                                                                   |                        |
| Possibility of frozen section at the time of surgical intervention                              | Yes                    |
| <b>Outcome indicators</b>                                                                       |                        |
| Indicator 3.1                                                                                   |                        |
| Rate of complete surgical resection either at initial surgery or after neoadjuvant chemotherapy | Yes                    |
| Indicator 3.2                                                                                   |                        |
| Availability of a morbi-mortality report                                                        | Yes                    |

\* The analysis per patient of process indicators has not been assessed in this study.
